# Supplementary material for: Structural basis for effector protein recognition by the Dot/Icm Type IVB coupling protein complex
Source: PubMed Central journal article supplement (PMC7251119; doi:10.1038/s41467-020-16397-0), 2020-05-26
Supplement: 41467_2020_16397_MOESM2_ESM.pdf [file 41467_2020_16397_MOESM2_ESM.pdf]

Supplementary Information

**Structural basis for effector protein recognition by the  
Dot/Icm Type IVB coupling protein complex**

Hyunmin Kim et al.

**a****VpdB(461-590)**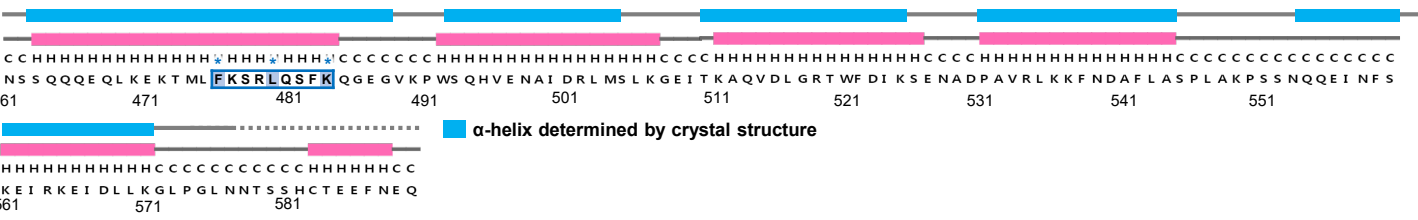**SidH(1830-2200)**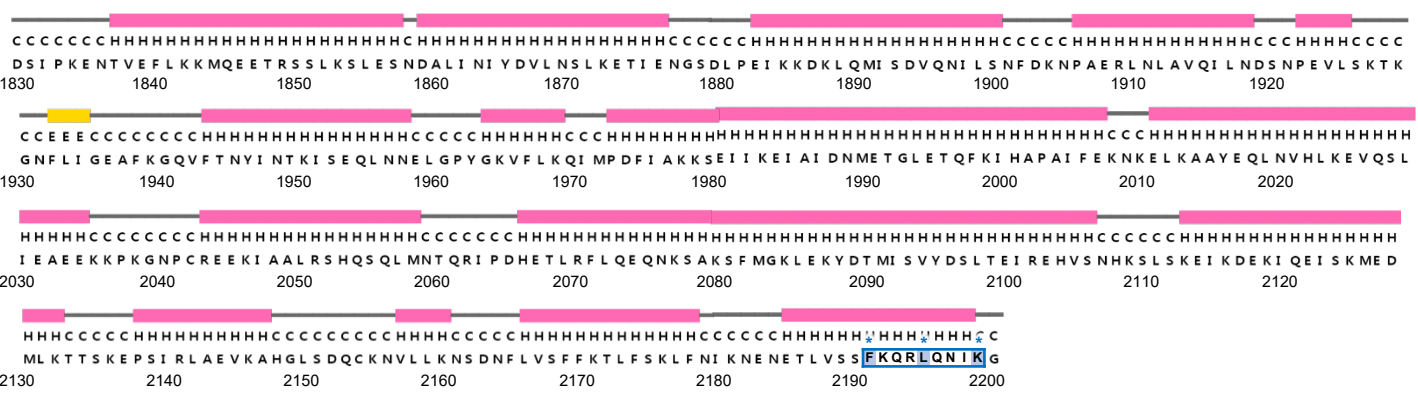**SetA(480-644)**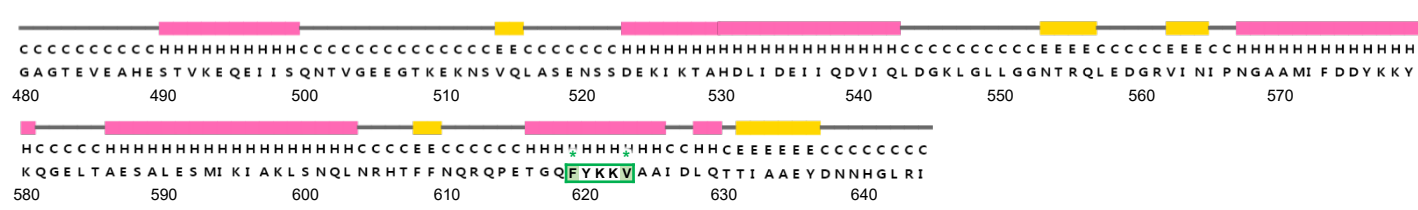**PieA(513-699)**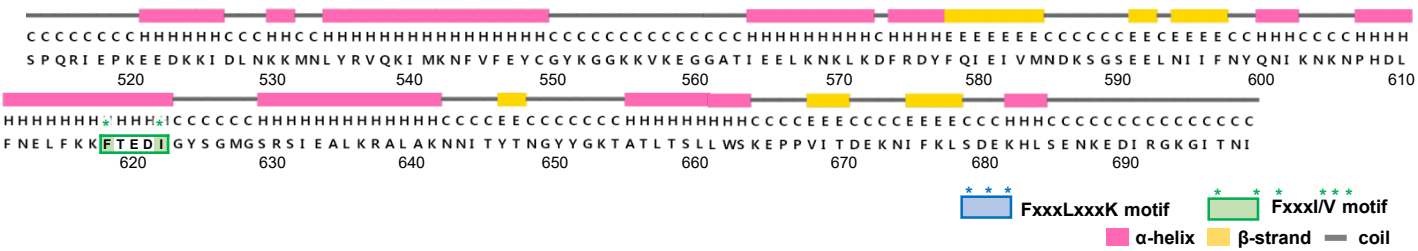**b**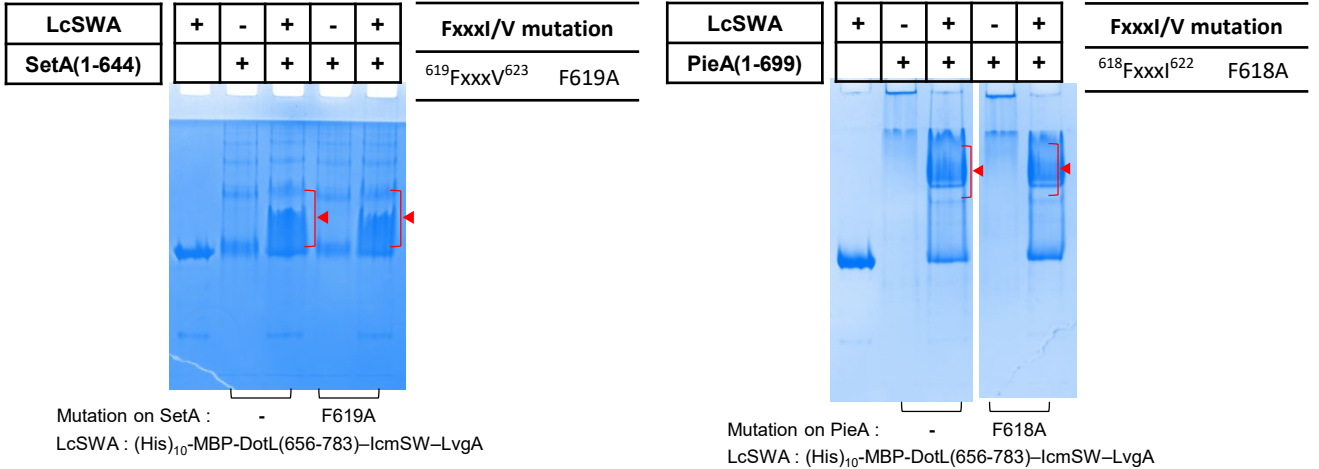

### **Supplementary Figure 1. Secondary structure prediction, sequence motifs and protein-binding assay**

(a) Secondary structure prediction and the positions of the sequence motifs.

Psi-PRED was used to predict the secondary structures of the four indicated protein constructs that bind to DotL(656-783)–IcmSW–LvgA. Experimentally determined secondary structures are shown for VpdB(461-590).

The positions of the FxxxLxxxK and FxxxI/V sequence motifs are indicated by the blue or green boxes.

(b) Phe-to-Ala mutation in the FxxxI/V motif of SetA(480-644) and PieA(513-699).

The mutation points are indicated. The wild-type or mutant constructs were incubated with (His)<sub>10</sub>-DotL(656-783)–IcmSW–LvgA complex (10 μM) at a 1:1 molar ratio, and subjected to native PAGE. No detectable change in the formation of the new protein band (red arrowheads) was observable for both of the protein constructs. The native PAGE analyses were repeated more than three times.

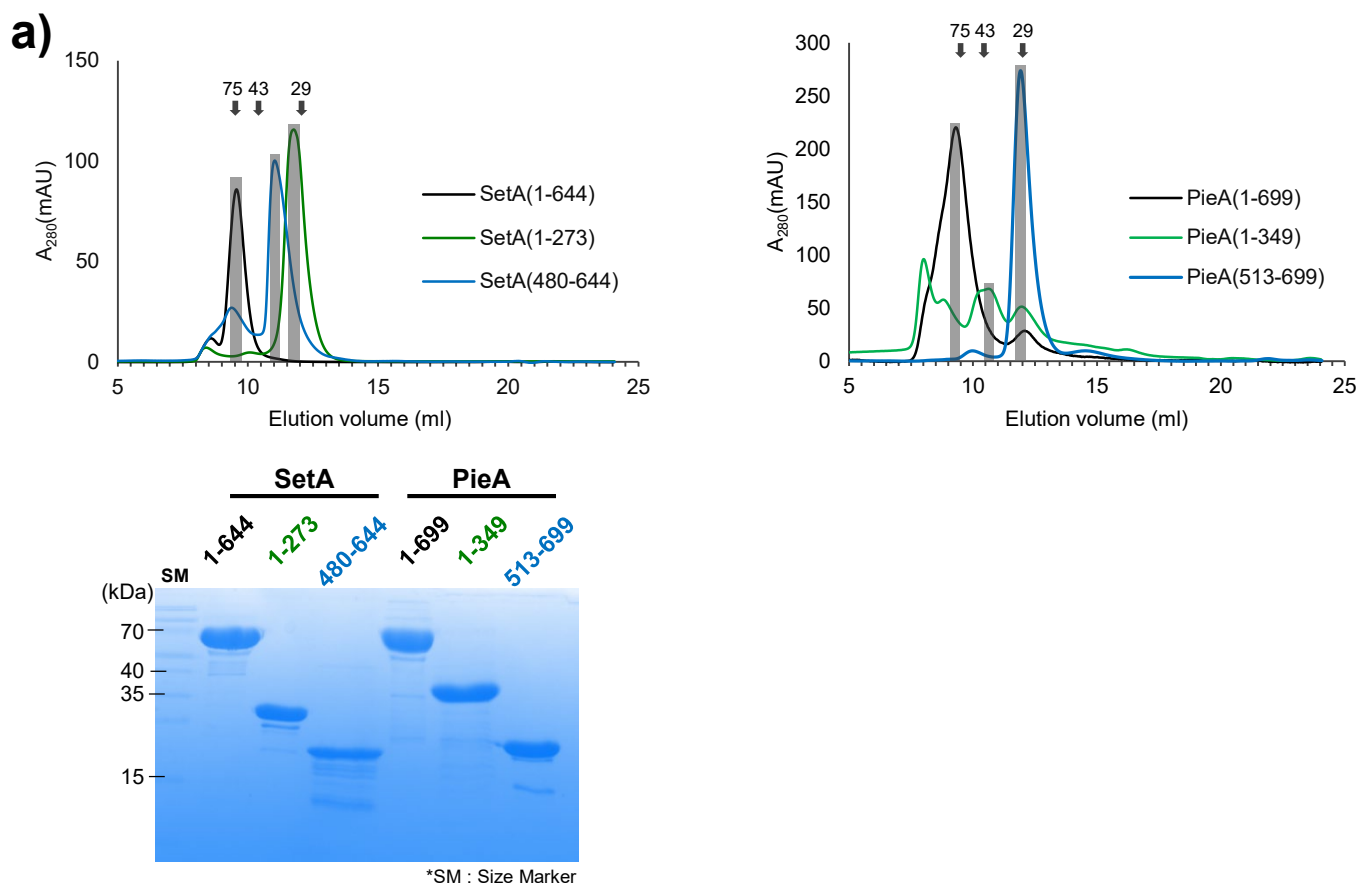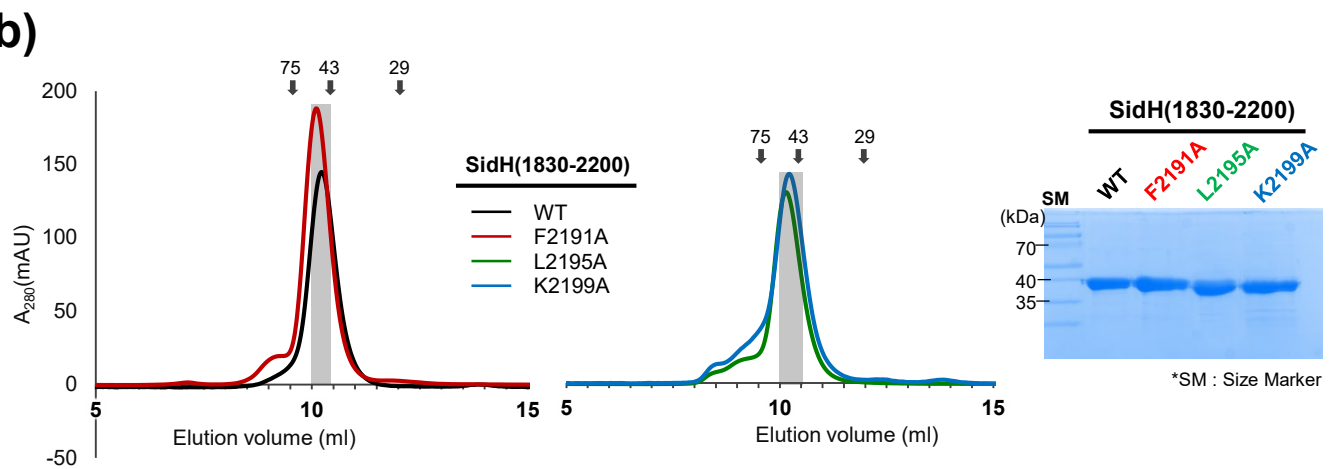

### Supplementary Figure 2. Size-exclusion chromatography and SDS-PAGE of SetA, PieA and SidH constructs

The proteins were loaded onto a Superdex 75 Increase 10/300 GL column and eluted with a buffer solution containing 20 mM Tris-HCl (pH 7.5) plus 100 mM NaCl or 300 mM NaCl. Size marker positions are shown. The subfractions indicated by the grey bar were used for the SDS-PAGE runs and for all other biochemical analyses.

(a) Except for the PieA(1-349), the other constructs were eluted as a narrow major peak. SetA(480-644) was eluted as if it is a dimer, while all the others as a monomer.

(b) Wild-type SidH(1830-2200) and three other SidH mutants exhibited virtually the same elution peak, while minor higher-molecular weight species were observed with the mutants.

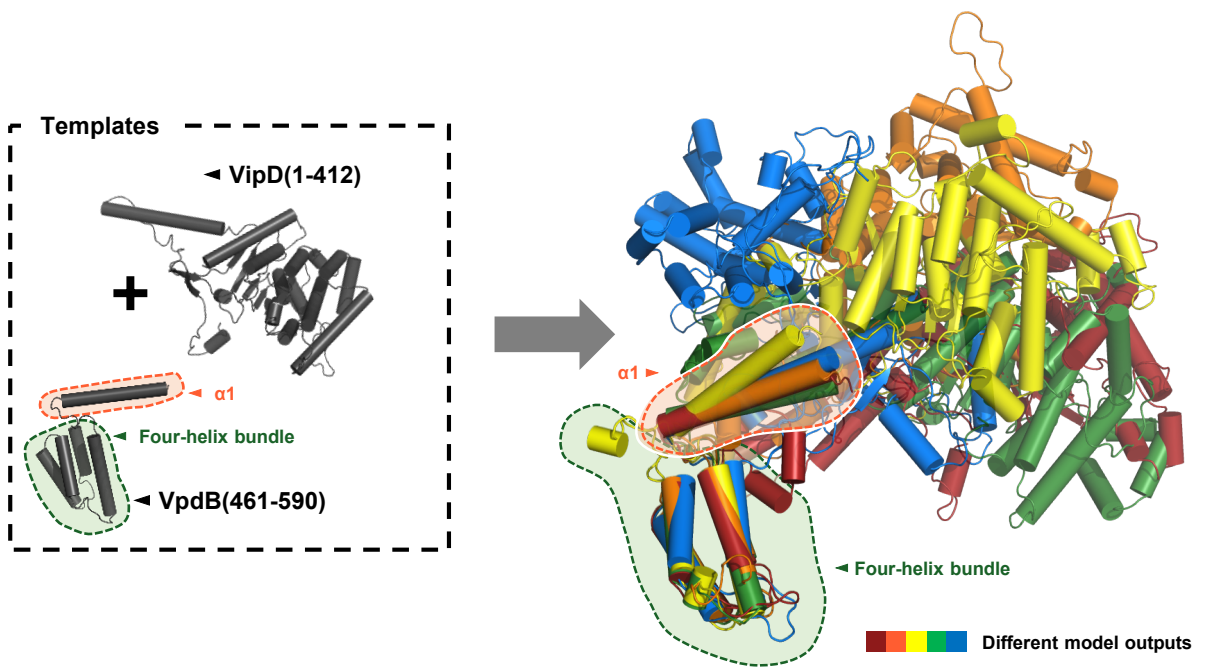

**Supplementary Figure 3. Superposition of five homology models of full-length VpdB.**

The two templates (*Left*) do not cover a middle segment of VpdB (residues 425-460), and consequently the homology models (*Right*) are heterogeneous in the relative orientations of the N- and C-terminal domains. The five output models are superposed with the C-terminal domains, which correspond to VpdB(461-590).

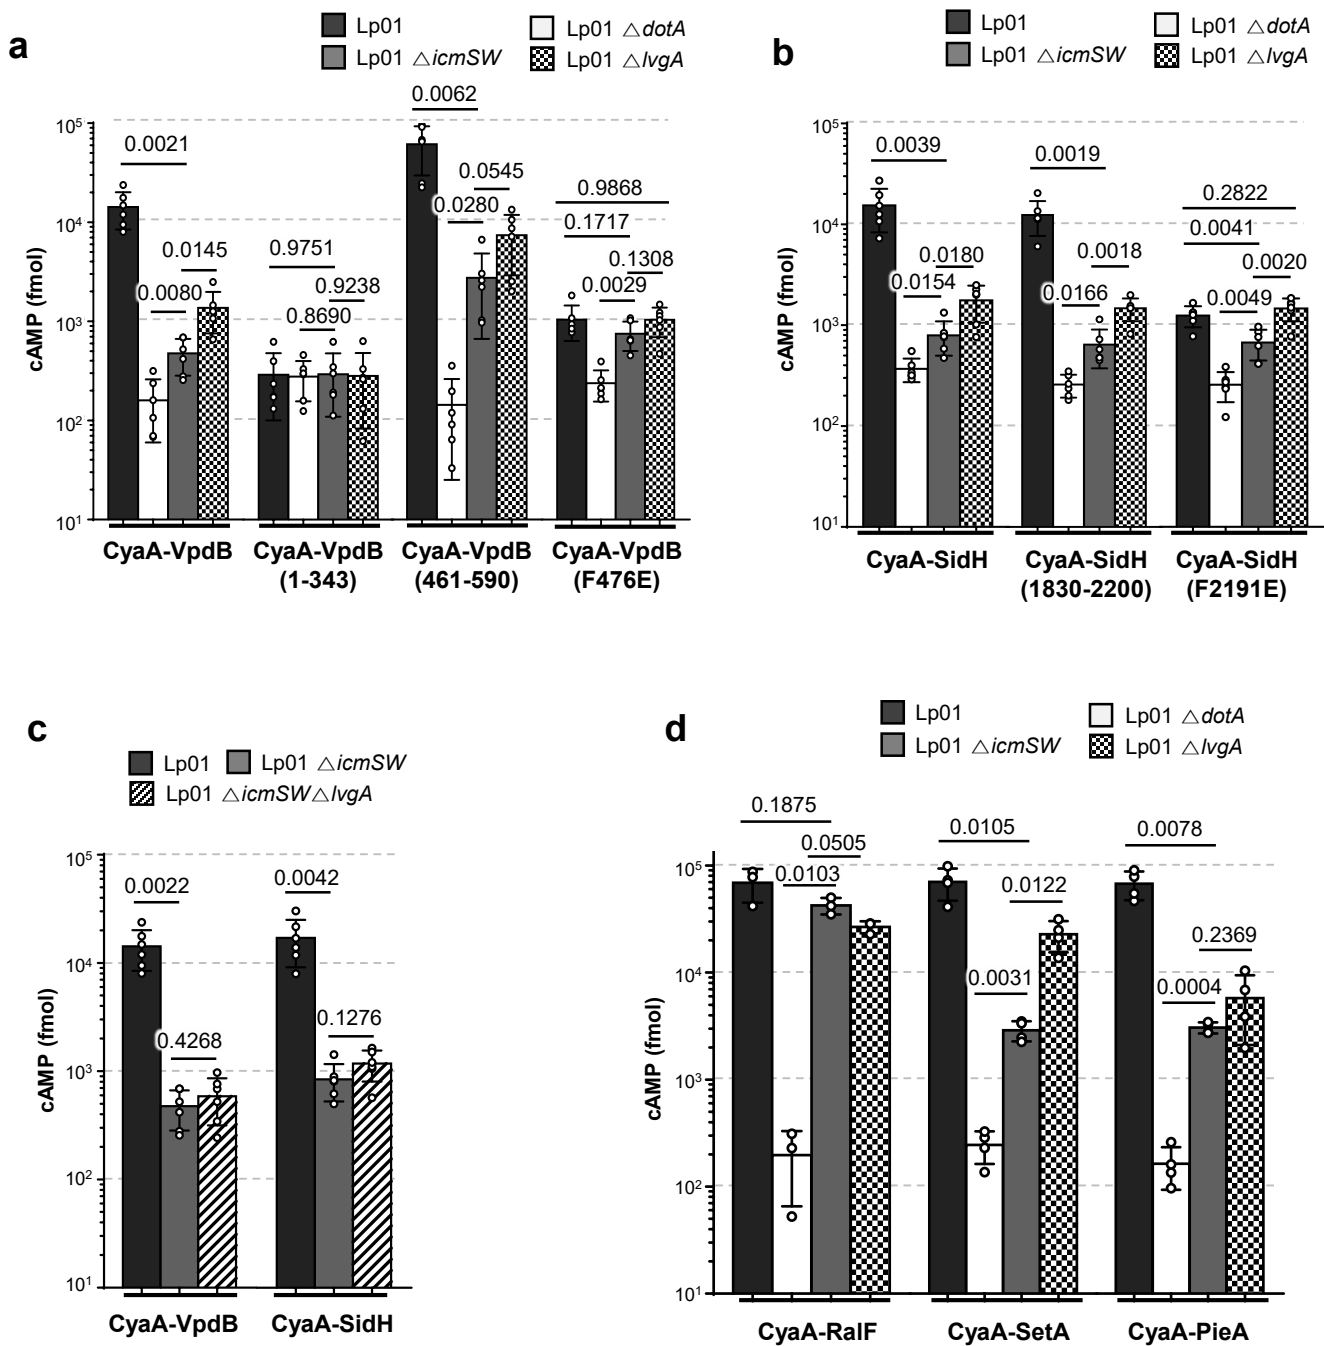

Supplementary Figure 4. Figure 4 with exact p-values marked on the graphs.

**Supplementary Table 1. X-ray data collection and structure refinement statistics**

| <b>Data Collection</b>              | <b>DotL(656-783)–lcmSW–LvgA–VpdB(461-590)</b> |
|-------------------------------------|-----------------------------------------------|
| Space group                         | P41212                                        |
| Unit cell dimensions                |                                               |
| a, b, c (Å)                         | 188.992, 188.992, 170.252                     |
| $\alpha$ , $\beta$ , $\gamma$ (°)   | 90, 90, 90                                    |
| Wavelength (Å)                      | 1.0000                                        |
| Resolution (Å)                      | 45.84-2.801 (2.901-2.801) <sup>a</sup>        |
| $R_{\text{sym}}$                    | 10.6(31.1) <sup>a</sup>                       |
| $I/\sigma(I)$                       | 12.17(2.67) <sup>a</sup>                      |
| Completeness (%)                    | 99.5(98.7) <sup>a</sup>                       |
| Redundancy                          | 15.4(7.7) <sup>a</sup>                        |
| <b>Refinement</b>                   |                                               |
| Resolution (Å)                      | 47.25-2.801 (2.901-2.801) <sup>a</sup>        |
| No. of reflections                  | 75680                                         |
| $R_{\text{work}} / R_{\text{free}}$ | 0.1990/0.2450                                 |
| R.m.s deviations                    |                                               |
| bond (Å) / angle (°)                | 0.009/1.014                                   |
| Average B-values (Å <sup>2</sup> )  | 36.65                                         |
| Ramachandran plot (%)               |                                               |
| Favored / Additional allowed        | 90.7/9.0                                      |
| Generously allowed                  | 0.3                                           |

<sup>a</sup>The numbers in parentheses are the statistics from the highest resolution shell.

**Supplementary Table 2. List of primers used in this study**

| Gene        | Construct | F/R | Primer sequence                                         | Vectors                                       |         |
|-------------|-----------|-----|---------------------------------------------------------|-----------------------------------------------|---------|
| <b>DotL</b> | (656-783) | F   | ATACATATGGGTCAAAATGAACCCGAGCCT                          | pET 22b                                       |         |
|             |           | R   | ATAGTCGACTGTTAATTCCTCTGCAGCCTTTTTATTGG                  | pET 22b                                       |         |
| <b>lcmS</b> | (1-114)   | F   | ATACATATGGAGCGAGATATTAGCAAGTGTATGGC                     | pET 22b                                       |         |
|             |           | R   | TATGGTACCCTAATCATAACATTAACATCCAGGGGAGTATAA              | pET 22b                                       |         |
| <b>lcmW</b> | (1-151)   | F   | ATACATATGCCTGATTTAAGCCATGAAGCCT                         | pET 22b                                       |         |
|             |           | R   | AATGTCGACTTATTCATCCCTTCGAGTGCTCGTAAAC                   | pET 22b                                       |         |
| <b>LvgA</b> | (1-208)   | F   | AATCATATGGCAGACGGCGATATCGAAATC                          | pET 22b                                       |         |
|             |           | R   | ATTAAGCTTTTCATTTTCGTGCAGTAGTTCAGAAGATACTGG              | pET 22b                                       |         |
|             | *(I153E)  | F   | AGAAAGGCTTTTGAGTCGATTGAAAATTTACCTTATAACGTTGTTG<br>TGA   | pET 22b                                       |         |
|             |           | R   | TCACAACAACGTTATAAGGTAATTTCAATCGACTCAAAGCCTT<br>TCT      | pET 22b                                       |         |
| <b>VpdB</b> | (11-590)  | F   | ATACATATGTCAGCAGAGCCATCTGTAAATCTAGGA                    | pET 22b                                       |         |
|             |           | R   | ATAGTCGACCTGCTCATTAACTCTTCTGTACAAT                      | pET 22b                                       |         |
|             | (11-488)  | F   | ATACATATGTCAGCAGAGCCATCTGTAAATCTAGGA                    | pET 22b                                       |         |
|             |           | R   | ATAGTCGACTCATCCCTCTCCTTGTAAAACCTTGCAATCTTGATT<br>TAAATA | pET 22b                                       |         |
|             | (11-343)  | F   | ATACATATGTCAGCAGAGCCATCTGTAAATCTAGGA                    | pET 22b                                       |         |
|             |           | R   | ATAGTCGACTCAAGAAACCCCAATTGTAGTTACAACGCCTGGAGT<br>ATA    | pET 22b                                       |         |
|             | (425-590) | F   | ATACATATGGGCGTGATCGAGGTAGGTAAAG                         | pET 22b                                       |         |
|             |           | R   | ATAGTCGACCTGCTCATTAACTCTTCTGTACAAT                      | pET 22b                                       |         |
|             | (461-590) | F   | ATACATATGAACAGCAGTCAGCAACAAGAGCA                        | pET 22b                                       |         |
|             |           | R   | ATAGTCGACCTGCTCATTAACTCTTCTGTACAAT                      | pET 22b                                       |         |
|             | (461-488) | F   | ATACATATGAACAGCAGTCAGCAACAAGAGCA                        | pET 22b                                       |         |
|             |           | R   | ATAGTCGACTCCCTCTCCTTGTAAAACCTTGCAATCTTGATTTAA<br>ATA    | pET 22b                                       |         |
|             | (489-590) | F   | ATACATATGGTCAAACCTTGGTCTCAGCATGTGGA                     | pET 22b                                       |         |
|             |           | R   | ATAGTCGACCTGCTCATTAACTCTTCTGTACAAT                      | pET 22b                                       |         |
|             | *(F476E)  |     | F                                                       | AATTGAAAGAAAAGACCATGTTAGAAAAATCAAGATTGCAAAGTT | pET 22b |
|             |           |     | R                                                       | AACTTTGCAATCTTGATTTTTCTAACATGGTCTTTTCTTTCAATT | pET 22b |
|             | *(K470A)  |     | F                                                       | AGAGCAATTGGCGGAAAAGACCAT                      | pET 22b |
|             |           |     | R                                                       | ATGGTCTTTTCCGCCAATTGCTCT                      | pET 22b |
|             | *(T473A)  |     | F                                                       | TTGAAAGAAAAGGCCATGTTATTTA                     | pET 22b |
|             |           |     | R                                                       | TAAATAACATGGCCTTTTCTTTCAA                     | pET 22b |
| *(F476A)    |           | F   | AAGACCATGTTAGCGAAATCAAGATT                              | pET 22b                                       |         |
|             |           | R   | AATCTTGATTTGCTAACATGGTCTT                               | pET 22b                                       |         |



|             |             |   |                                                      |          |
|-------------|-------------|---|------------------------------------------------------|----------|
|             | *(L480A)    | F | TAAATCAAGAGCGCAAAGTTTTA                              | pET 22b  |
|             |             | R | TAAACTTTGCGCTCTTGATTTAA                              | pET 22b  |
|             | *(F483A)    | F | ATTGCAAAGTGCGAAACAAGGA                               | pET 22b  |
|             |             | R | TCCTTGTTTCGCACTTTGCAAT                               | pET 22b  |
|             | *(K484A)    | F | TGCAAAGTTTTGCACAAGGAGA                               | pET 22b  |
|             |             | R | TCTCCTTGTCAAAACCTTTGCA                               | pET 22b  |
|             | (1-598)     | F | GCGCAGTGGAACGCGGTACCATGAAAACGGTAAATAGTCAAAATG<br>GTA | pMMB 207 |
|             |             | R | GCAGGTCGACTCTAGATTACGCCCTATATAGGGATGGTG              | pMMB 207 |
|             | (1-343)     | F | GCGCAGTGGAACGCGGTACCATGAAAACGGTAAATAGTCAAAATG<br>GTA | pMMB 207 |
|             |             | R | GCAGGTCGACTCTAGAGCAAGAAACCCCAATTGTAGTTACAACG         | pMMB 207 |
|             | (461-598)   | F | GCGCAGTGGAACGCGGTACCAACAGCAGTCAGCAACAAGAGC           | pMMB 207 |
|             |             | R | GCAGGTCGACTCTAGATTACGCCCTATATAGGGATGGTG              | pMMB 207 |
| <b>SetA</b> | (1-644)     | F | ATACATATGATGTATAAAATATATTCATATCTAGGTTGGAGAATTGA<br>T | pET 22b  |
|             |             | R | AGGATCCCGCGTCGACTATTCTTAAACCATGATTGTTATCG            | pET 22b  |
|             | (1-273)     | F | ATACATATGATGTATAAAATATATTCATATCTAGGTTGGAGAATTGA<br>T | pET 22b  |
|             |             | R | ATAGTCGACTGTATTGTTCTGTGGTACATAAAAATAGT               | pET 22b  |
|             | (480-644)   | F | ATACATATGGGAGCGGGAACAGAAGTT                          | pET 22b  |
|             |             | R | AGGATCCCGCGTCGACTATTCTTAAACCATGATTGTTATCG            | pET 22b  |
|             | *(F619A)    | F | CAACCAGAAACCGGGCAAGCGTATAAAAAAGTGGCT                 | pET 22b  |
|             |             | R | AGCCACTTTTTTATACGCTTGCCCGGTTTCTGGTTG                 | pET 22b  |
|             | (1-644)     | F | CGGTACCCGGGGATCCATGTATAAAATATATTCATATCTAG            | pMMB 207 |
|             |             | R | CAAAACAGCCAAGCTTTTATATTCTTAAACCATGATTG               | pMMB 207 |
| <b>PieA</b> | (1-699)     | F | AATCATATGCAAGAAAAAATTATCAACTTAGGGAAAGGGCT            | pET 22b  |
|             |             | R | ATTTCTAGAGATATTCGTAATTCCTTTTCCGCGAATATCTTCC          | pET 22b  |
|             | (1-349)     | F | AATCATATGCAAGAAAAAATTATCAACTTAGGGAAAGGGCT            | pET 22b  |
|             |             | R | ATAGTCGACCGACTTATCCAAACAGCGCTCAA                     | pET 22b  |
|             | (513-699)   | F | AAGGAGATATACATATGTCACCACAGAGAATAGAACCAAAAG           | pET 22b  |
|             |             | R | ATTTCTAGAGATATTCGTAATTCCTTTTCCGCGAATATCTTCC          | pET 22b  |
|             | *(F618A)    | F | TTAATGAGCTCTTTAAAAAAGCGACCGAAGACATAGGATATTCT         | pET 22b  |
|             |             | R | AGAATATCCTATGTCTTCGGTCGCTTTTTTAAAGAGCTCATTA          | pET 22b  |
|             | (1-699)     | F | GCGCAGTGGAACGCGGTATGCAAGAAAAAATTATCAACTTAG           | pMMB 207 |
|             |             | R | GCAGGTCGACTCTAGACTAGATATTCGTAATTCCTTTTCCG            | pMMB 207 |
| <b>SidH</b> | (1830-2200) | F | ATAGTCGACGACAGTATTCCTAAAGAAAATACAGTGGAAT             | pET 22b  |
|             |             | R | ATATCTAGAACCCTTGATATTTTGCAGCCTT                      | pET 22b  |
|             | *(F2191A)   | F | AATGAACTTTGGTTTCATCAGCCAAACAAAGGCTGCAA               | pET 22b  |

|             |   |                                                           |          |
|-------------|---|-----------------------------------------------------------|----------|
|             | R | TTGCAGCCTTTGTTTGGCTGATGAAACCAAAGTTTCATT                   | pET 22b  |
| *(L2195A)   | F | TCATCATTCAAACAAAGGGCCCAAAATATCAAGGGT                      | pET 22b  |
|             | R | ACCCTTGATATTTTGGGCCCTTTGTTTGAATGATGA                      | pET 22b  |
| *(K2199A)   | F | AACAAAGGCTGCAAAATATCGCCGGTTCTAGAGGAAAGCTTTAAT             | pET 22b  |
|             | R | ATTAAAGCTTTCCTCTAGAACCGGCGATATTTTGCAGCCTTTGTT             | pET 22b  |
| (2183-2200) | F | CCATATGGGTGTCGACGAAAATGAAACTTTGGT                         | pET 22b  |
|             | R | ATATCTAGAACCCTTGATATTTTGCAGCCTTT                          | pET 22b  |
| (1-2225)    | F | CGGTACCCGGGGATCCATGAAAAGAACCATTGAAACCTACATCAT             | pMMB 207 |
|             | R | CAAAACAGCCAAGCTTTTAGAATCTGGTAATATTGGCATTCACTAA<br>AGGT    | pMMB 207 |
| (1830-2200) | F | CGGTACCCGGGGATCCGACAGTATTCCTAAAGAAAATACAGTGGA<br>ATTCCTTA | pMMB 207 |
|             | R | CAAAACAGCCAAGCTTACCCTTGATATTTTGCAGCCTTTGT                 | pMMB 207 |

---

\*Primers listed for constructs with point mutation are used for site-directed mutagenesis.
